# Supplementary material
Source: PubMed Central journal article supplement (PMC10524395)
Supplement: NIHMS1903061-supplement-003808_-_Supplemental_Material.pdf [file NIHMS1903061-supplement-003808_-_Supplemental_Material.pdf]

# Supplemental Material

## Table of Contents

|                                                                                                                                                           |           |
|-----------------------------------------------------------------------------------------------------------------------------------------------------------|-----------|
| <b>Supplementary Methods</b>                                                                                                                              | <b>3</b>  |
| <b>Study sample</b>                                                                                                                                       | <b>3</b>  |
| <b>Predicted risk of AF</b>                                                                                                                               | <b>3</b>  |
| <b>Genetic data</b>                                                                                                                                       | <b>5</b>  |
| <b>Common variant analyses</b>                                                                                                                            | <b>5</b>  |
| <b>Heritability and genetic correlation</b>                                                                                                               | <b>6</b>  |
| <b>Polygenic risk scores</b>                                                                                                                              | <b>7</b>  |
| <b>Associations between polygenic risk scores and incident AF</b>                                                                                         | <b>7</b>  |
| <b>Mendelian Randomization</b>                                                                                                                            | <b>8</b>  |
| <b>Expression association analysis</b>                                                                                                                    | <b>8</b>  |
| <b>Median waveform analysis</b>                                                                                                                           | <b>9</b>  |
| <b>Supplementary Table I. Risk loci in ECG-AI AF risk GWAS</b>                                                                                            | <b>10</b> |
| <b>Supplementary Table II. Summary statistics from reference AF GWAS* for SNPs in high LD with top SNPs at <i>VGLL2</i> and <i>EXT1</i> loci</b>          | <b>11</b> |
| <b>Supplementary Table III. Association between AF and predicted gene expression levels of <i>VGLL2</i> and <i>EXT1</i> across 49 GTEx* tissues</b>       | <b>12</b> |
| <b>Supplementary Table IV. Risk loci in CHARGE-AF risk GWAS</b>                                                                                           | <b>13</b> |
| <b>Supplementary Table V. Traits associated with lead SNVs identified in the CHARGE GWAS</b>                                                              | <b>16</b> |
| <b>Supplementary Table VI. Summary statistics of the independent significant lead single nucleotide variants (SNVs) from each GWAS in the other GWAS.</b> | <b>19</b> |
| <b>Supplementary Table VII. Heritability and genetic correlation estimates for ECG-AI, CHARGE-AF, and previously reported AF GWAS.</b>                    | <b>20</b> |
| <b>Supplementary Table VIII. C-index of Cox Proportional Hazard models testing polygenic risk scores of ECG-AI and CHARGE-AF scores</b>                   | <b>21</b> |
| <b>Supplementary Table IX. Polygenic risk and incident AF in a subset of White British participants (N=370,121).</b>                                      | <b>22</b> |

|                                                                                                                                                              |           |
|--------------------------------------------------------------------------------------------------------------------------------------------------------------|-----------|
| <b>Supplementary Figure I. LocusZoom plots comparing ECG-AI GWAS and reference AF GWAS* at <i>VGLL2</i> and <i>EXT1</i> loci</b>                             | <b>23</b> |
| <b>Supplementary Figure II. LocusZoom plots of significant risk loci in the ECG-AI predicted 5-year AF risk GWAS.</b>                                        | <b>24</b> |
| <b>Supplementary Figure III. LocusZoom plots of significant risk loci in the CHARGE-AF predicted 5-year AF risk GWAS.</b>                                    | <b>25</b> |
| <b>Supplementary Figure IV. ECG-AI and CHARGE-AF polygenic risk and cumulative incidence of AF.</b>                                                          | <b>29</b> |
| <b>Supplementary Figure V. ECG-AI and CHARGE-AF polygenic risk and cumulative incidence of AF in a subset of White British participants (N=370,121).</b>     | <b>30</b> |
| <b>Supplementary Figure VI. Median ECG waveforms for individuals at highest and lowest ECG-AI genetic risk at significant loci implicated in ECG-AI GWAS</b> | <b>31</b> |

## Supplementary Methods

### Study sample

Individual-level data used in the present study were from the UK Biobank, a prospective cohort study comprising 502,629 individuals aged 40 to 69 at enrollment from the United Kingdom during 2006-2010.<sup>9,10</sup> Briefly, phenotypic data comprising survey, longitudinal electronic health record, national registry, imaging, and other bioassay data were collected. In total 488,377 participants underwent genome-wide genotyping as summarized below. Of these, 39,986 individuals who underwent 12-lead ECG collection and had complete data to estimate the CHARGE-AF score, were without a history of AF at the time of ECG acquisition, and in whom data passed quality control (QC) procedures, were included in the genome-wide association studies (GWAS) of predicted AF risk using either ECG-AI or CHARGE-AF. Of the remaining 448,391 individuals without ECGs, 424,411 that passed genome-wide genotyping QC procedures were included in polygenic risk score analyses. The study overview and analytic workflow can be found in **Figure 1**.

### Predicted risk of AF

Our study outcome was the predicted 5-year risk of AF. The 5-year risk of AF was derived from both an ECG-AI model, and separately from the CHARGE-AF clinical risk factor model. The development and validation of the ECG-AI model has previously been reported.<sup>7</sup> Briefly, we trained a convolutional neural network (CNN) to predict 5-year risk of AF using 12-lead ECGs in a longitudinal patient cohort derived from the MGB network.<sup>34</sup> ECG-AI uses an encoding and loss function that takes into account both time to event (i.e., AF) and missingness introduced by censoring (death or loss of follow-up) to estimate a 5-year survival probability of AF. The

predicted AF risk was then calculated as one minus the survival directly outputted from the ECG-AI model. We assessed discrimination of ECG-AI predicted risk for 5-year AF by calculating Harrell's c-index<sup>35</sup> and found a moderate discrimination of 0.70 (95% confidence interval: 0.67-0.72) in the 39,986 GWAS discovery set.

We calculated the CHARGE-AF predicted 5-year risk of AF using the published equation  $1 - 0.9718412736^{\exp(X - 12.5815600)}$ , where  $X$  is the CHARGE-AF score for each individual.<sup>8</sup> Clinical risk factors in the score include baseline age, race, height, weight, systolic and diastolic blood pressure, smoking status, antihypertensive medication use, diabetes, heart failure, and myocardial infarction. Clinical variables were based on self-report (race, smoking status, antihypertensive medication use), measurements at the ECG visit in the UK Biobank (age at ECG, height, weight, systolic and diastolic blood pressure), or inpatient international classification of diseases (ICD) 9 or 10 codes (diabetes, heart failure, myocardial infarction) as has been described previously.<sup>7</sup> CHARGE-AF has been validated widely and shown to have good discrimination with C-statistics ranging from 0.66 to 0.81.<sup>8,36,37</sup> The ECG-AI and CHARGE-AF score linear predictors have previously been reported to have modest correlation (Pearson  $r$  0.66) in an independent dataset, and the CHARGE-AF score exhibits similar predictive performance as ECG-AI.<sup>7</sup> For survival analysis in the present study, incident AF at 5 years was ascertained using follow-up information and a previously published definition comprising inpatient ICD-9 and -10 codes, and procedural codes.<sup>38</sup> Follow-up information in the UK Biobank depends on the availability of linked electronic health records and hence varies by enrollment sites. Censoring occurred at death, withdrawal of consent, or last availability of hospital linked data.<sup>7</sup>

## Genetic data

Genotyping was carried out using two different arrays (UK BiLEVE Axiom Array and UK Biobank Axiom Array) with 95% shared marker content. After variants and sample QC processes, these markers were phased and imputed to the Haplotype Reference Consortium (HRC) and the merged UK10K and 1000 Genomes phase 3 reference panels, resulting in ~96 million variants in the final dataset.<sup>10</sup> We used the QC metrics provided by the UK Biobank to perform sample QC. Participants who had mismatch between self-reported sex and genetically inferred sex, high genotype missingness rate, high heterozygosity rate, or sex chromosome aneuploidy were removed from the analysis. UK Biobank calculated and provided the top 40 principal components for the entire cohort using 407,219 unrelated, high-quality samples and 147,604 high-quality, pruned markers. The PCA analysis was performed using the fastPCA<sup>39</sup> algorithm. Subsequently, all samples were projected onto the PCA space to obtain values for the entire cohort.<sup>39</sup> We used genotyped markers to fit null models for the GWAS. Variants were filtered out if MAF was  $< 0.1\%$ , minor allele count (MAC) was  $< 100$ , missing call rate was  $> 0.1$ , or Hardy-Weinberg equilibrium exact test  $P < 1 \times 10^{-5}$ . In addition, samples with a missingness call rate  $> 0.1$  were excluded from the analysis. We then performed the association tests using imputed genetic data, and variants included were those with a minor allele frequency (MAF)  $> 0.1\%$  and an information score (imputation quality)  $> 0.3$ .

## Common variant analyses

We conducted a GWAS of ECG-AI predicted 5-year AF risk, and a separate GWAS of CHARGE-AF predicted 5-year AF risk as a comparator. Rank-based inverse normal transformation (R-INT) was applied to each phenotype before association testing. We used the software Regenie,<sup>40</sup> which implements an efficient whole-genome regression approach, for this

analysis assuming an additive genetic model for each single nucleotide variant (SNV). Covariates adjusted in statistical models included age at the time of ECG, sex, genotyping array, and the first 20 principal components of ancestry. We also conducted conditional analyses<sup>41</sup> using the GCTA software to select secondary independent significant SNVs at each locus. In addition, as a comparator, we performed a GWAS of observed 5-year incident AF in the same dataset using Cox Mixed-Effects models<sup>42</sup> implemented in the *coxme* R package with the same covariates. Due to computational burden, we only tested variants with MAF > 10% and information score (imputation quality) > 0.9. Genome-wide significant variants were considered those with  $P < 5 \times 10^{-8}$ . The mapped gene at each risk locus was either the nearest gene or the trait-associated gene within 500 kb of the lead SNV reported in the GWAS catalog.

### **Heritability and genetic correlation**

We calculated the additive heritability ( $h^2$ ) for predicted risk of AF using a variance-components analysis with individual-level genetic and phenotypic data in our GWAS set, adjusting for age at the time of ECG, sex, genotyping array, and the first 20 principal components of ancestry using BOLT-REML.<sup>43</sup> We also used the same method to estimate the genetic correlation between the GWAS of predicted AF risk and 5-year observed incident AF. BOLT-REML implements a Monte Carlo average information restricted maximum-likelihood algorithm to estimate the genetic variance-covariance matrix. We then utilized GWAS summary statistics with LD score regression (LDSC)<sup>14</sup> to corroborate the heritability and genetic correlation estimates. GWAS results of predicted AF risk from the above common variant analyses were compared to a prior large-scale GWAS of AF.<sup>11</sup> We used pre-computed LD-scores provided by the LDSC software package. Here we report the raw genetic correlation estimates without any conversion since these parameters accurately reflect the genetic correlation of underlying disease liabilities.<sup>44</sup>

Heritability estimates were also not converted from observed scale to liability scale since predicted risks were normally distributed continuous traits after rank-based inverse normal transformation.

### **Polygenic risk scores**

We derived polygenic risk scores (PRS) for ECG-AI and CHARGE-AF predicted risk of AF using the GWAS results and then applied these to the remaining participants without ECG data (**Figure 1**). In addition to the sample QC procedures described above, we further excluded participants with > 3rd degree relatedness in the GWAS set. The SNV effect sizes used in score calculations were obtained by using a fully Bayesian approach, PRS-CS,<sup>45</sup> which applies shrinkage factors to the original GWAS effect sizes to avoid overfitting. The polygenic score was calculated as the PRS-CS adjusted SNV effect size-weighted sum of the individual's genetic dosage at effect alleles. Score calculations were carried out using PLINK 2.0 [<https://www.cog-genomics.org/plink/2.0/>].

### **Associations between polygenic risk scores and incident AF**

We tested the association between each polygenic risk score and 5-year incident AF using a Cox proportional hazards model adjusting for age at enrollment, sex, genotyping array, and the first 20 principal components of ancestry. We also fit another model containing both PRSs with the same covariates to estimate the effect of each PRS on 5-year incident AF risk after conditioning on the other PRS. We then further extended the model to include an interaction term between the two PRSs to assess for effect modification. We plotted the cumulative incidence of AF stratified by distribution of PRS risk (highest 10%, middle 80%, and lowest 10%). We performed the above analyses in the entire testing set as well as a subset of White British participants to assess

the properties of PRSs across ancestries. All analyses were conducted using *survival* and *survminer* packages in R version 4.0.

### **Mendelian Randomization**

We employed a two-sample Mendelian randomization (2SMR) approach<sup>46</sup> implemented in the *TwoSampleMR*<sup>47</sup> R package to estimate potential causal effects of exposures on outcomes using GWAS summary statistics. Genetic instruments were chosen from GWAS results of exposure traits if they reached  $P < 5 \times 10^{-8}$ . A clumping step was then performed to select independent variants within 10,000 kb distance with a maximum LD  $r^2$  of 0.001. These SNPs were then extracted from our ECG-AI risk summary statistics if they were present in both GWAS. The resulting genetic instruments were harmonized before analysis to ensure the effect alleles were consistent between the two studies. Summary statistics for P wave duration<sup>16</sup> (unit: ms) and height<sup>48</sup> (unit: SD) were chosen from studies that did not include UK Biobank samples. For each exposure, we performed MR analysis using five methods, including inverse variance weighted approach, weighted median approach, MR-Egger,<sup>49</sup> MR-PRESSO,<sup>50</sup> and MR-PRESSO corrected for horizontal pleiotropic outliers.

### **Expression association analysis**

We investigated novel ECG-AI GWAS loci by examining their associations with AF in a prior AF GWAS,<sup>11</sup> and conducted an expression association analysis using the reference AF GWAS summary statistics with the MetaXcan software [<https://github.com/hakyimlab/MetaXcan>] to assess for associations between predicted gene expression and AF. Specifically, we tested associations between AF and the predicted expression of *VGLL2* and *EXT1* across 49 tissues from the GTEx (Genotype-Tissue Expression project)<sup>52</sup> database using the S-MultiXcan



approach.<sup>51</sup> Briefly the approach calculates associations between AF and predicted gene expression in individual tissues first, then infers the joint estimates of effect sizes of predicted expression on phenotype using the marginal estimates across tissues.

### **Median waveform analysis**

To discern what ECG features were responsible for associations with observed genes, in exploratory analyses we created 4 gene-based polygenic risk scores (PRS) for discovered loci at *TTN*, *SCN5A/10A*, *VGLL2* and *EXT1*, respectively. Specifically, we took the variant weights used for creating the genome-wide PRS<sub>ECG-AI</sub> but restricted variants to those residing in the gene regions of interest (defined as 500kb around the gene) to create the gene-based scores. We then selected the top and bottom 1% groups from each of the PRS distributions and plotted the median ECG waveforms within each group.

## Supplementary Table I. Risk loci in ECG-AI AF risk GWAS

| rsID                                 | Chr-Position (hg19) | Effect / Reference Allele | Effect Allele Frequency | Beta  | Se   | P        | Imp Qual | Function   | Nearest gene  | eQTL for gene(s) in heart tissues | prior GWAS associations                                                                                                                                                                                                  | GWAS associations reported for high LD SNVs                                                                                                                                                                                                                                                                                        |
|--------------------------------------|---------------------|---------------------------|-------------------------|-------|------|----------|----------|------------|---------------|-----------------------------------|--------------------------------------------------------------------------------------------------------------------------------------------------------------------------------------------------------------------------|------------------------------------------------------------------------------------------------------------------------------------------------------------------------------------------------------------------------------------------------------------------------------------------------------------------------------------|
| rs2627040                            | 2-179601975         | G/A                       | 0.05                    | 0.08  | 0.01 | 4.55E-08 | 0.999    | intronic   | <i>TTN</i>    |                                   | No association reported in GWAS catalog                                                                                                                                                                                  | QT interval                                                                                                                                                                                                                                                                                                                        |
| rs6801957                            | 3-38767315          | C/T                       | 0.60                    | -0.04 | 0.01 | 2.68E-12 | 1.000    | intronic   | <i>SCN10A</i> | <i>SCN10A</i>                     | Atrial fibrillation/atrial flutter, Electrocardiogram morphology (amplitude at temporal datapoints), Electrocardiographic traits (multivariate), PR interval, P wave duration, QT interval, QRS duration, Pulse pressure | Atrial fibrillation, Electrocardiographic traits, Electrocardiographic conduction measures, QRS duration, Heart rate response to recovery post exercise, PR interval, P wave duration, PR segment, QT interval, Pulse pressure, Atrioventricular conduction, Brugada syndrome, Heart rate response to exercise, Resting heart rate |
| rs9689288                            | 6-117508467         | G/C                       | 0.47                    | 0.04  | 0.01 | 5.05E-12 | 0.986    | intergenic | <i>VGLL2</i>  |                                   | No association reported in GWAS catalog                                                                                                                                                                                  |                                                                                                                                                                                                                                                                                                                                    |
| rs35186392                           | 8-118857805         | T/A                       | 0.20                    | 0.04  | 0.01 | 7.22E-09 | 0.991    | intronic   | <i>EXT1</i>   |                                   | No association reported in GWAS catalog                                                                                                                                                                                  |                                                                                                                                                                                                                                                                                                                                    |
| <b>Secondary association signals</b> |                     |                           |                         |       |      |          |          |            |               |                                   |                                                                                                                                                                                                                          |                                                                                                                                                                                                                                                                                                                                    |
| rs41312411                           | 3-38621237          | G/C                       | 0.15                    | 0.06  | 0.01 | 2.79E-10 | 0.981    | intronic   | <i>SCN5A</i>  |                                   | Electrocardiography, P wave duration, Resting heart rate                                                                                                                                                                 | PR interval, QT interval, QRS duration, Brugada syndrome                                                                                                                                                                                                                                                                           |

Genetic variants at risk loci independently associated with ECG-AI predicted 5-year AF risk.

**rsID:** variant ID; **Chr:** chromosome; **hg19:** genomic position based on build hg19; **Beta:** effect size of effect allele; **Se:** standard error; **P:** P-value in GWAS; **Imp Qual:** imputation quality.

**eQTL for gene(s) in heart tissues:** eQTL reported by the GTEx V8 data in Heart - Atrial Appendage tissue or Heart - Left Ventricle tissue.

**GWAS associations reported for high LD SNVs:** Traits associated with SNVs in high linkage disequilibrium ( $r^2 \geq 0.7$ ) with the lead SNV as reported in GWAS catalog.

**Supplementary Table II. Summary statistics from reference AF GWAS\* for  
SNPs in high LD with top SNPs at *VGLL2* and *EXT1* loci**

a. *VGLL2*

| Chromosome position | rs ID      | Effect allele | Other allele | Effect size | SE   | P value | r <sup>2</sup> with rs9689288 |
|---------------------|------------|---------------|--------------|-------------|------|---------|-------------------------------|
| 6-117460805         | rs11153650 | T             | C            | -0.02       | 0.01 | 0.01    | 0.991                         |
| 6-117522685         | rs1405210  | T             | C            | 0.02        | 0.01 | 0.02    | 0.985                         |
| 6-117485742         | rs1508305  | A             | G            | -0.02       | 0.01 | 0.02    | 0.995                         |
| 6-117477632         | rs2049528  | A             | G            | 0.02        | 0.01 | 0.01    | 0.992                         |
| 6-117463853         | rs3851205  | T             | C            | 0.02        | 0.01 | 0.01    | 0.991                         |
| 6-117510203         | rs6901720  | T             | G            | 0.02        | 0.01 | 0.02    | 0.996                         |
| 6-117497691         | rs6902752  | T             | C            | 0.02        | 0.01 | 0.01    | 0.995                         |
| 6-117460355         | rs6930573  | C             | G            | -0.02       | 0.01 | 0.01    | 0.991                         |
| 6-117459604         | rs9372474  | A             | G            | 0.02        | 0.01 | 0.01    | 0.991                         |
| 6-117469900         | rs9374634  | A             | G            | -0.02       | 0.01 | 0.01    | 0.991                         |
| 6-117465537         | rs9387449  | A             | G            | -0.02       | 0.01 | 0.01    | 0.991                         |
| 6-117483351         | rs9387451  | C             | G            | 0.02        | 0.01 | 0.02    | 0.995                         |
| 6-117493311         | rs9387452  | A             | G            | 0.02        | 0.01 | 0.02    | 0.995                         |
| 6-117482982         | rs9400981  | A             | G            | 0.02        | 0.01 | 0.02    | 0.995                         |
| 6-117487131         | rs9400982  | A             | G            | -0.02       | 0.01 | 0.02    | 0.995                         |

b. *EXT1*

| Chromosome position | rs ID      | Effect allele | Other allele | Effect size | SE   | P value  | r <sup>2</sup> with rs9689288 |
|---------------------|------------|---------------|--------------|-------------|------|----------|-------------------------------|
| 8-118857704         | rs12676684 | C             | G            | 0.04        | 0.01 | 5.40E-06 | 0.994                         |
| 8-118879130         | rs12677136 | T             | C            | -0.04       | 0.01 | 1.18E-04 | 0.816                         |
| 8-118869138         | rs12680472 | T             | C            | 0.04        | 0.01 | 4.96E-05 | 0.820                         |
| 8-118844039         | rs12682457 | T             | C            | -0.04       | 0.01 | 7.61E-05 | 0.930                         |
| 8-118863412         | rs17430357 | A             | T            | -0.04       | 0.01 | 8.16E-06 | 0.891                         |
| 8-118863445         | rs17430364 | A             | T            | -0.04       | 0.01 | 7.40E-06 | 0.892                         |
| 8-118838295         | rs17439784 | T             | C            | -0.04       | 0.01 | 6.14E-05 | 0.942                         |
| 8-118842934         | rs17439826 | A             | T            | 0.04        | 0.01 | 5.71E-05 | 0.931                         |
| 8-118879552         | rs28535273 | A             | G            | 0.03        | 0.01 | 1.87E-04 | 0.811                         |
| 8-118877575         | rs4129114  | A             | T            | 0.04        | 0.01 | 1.02E-04 | 0.819                         |
| 8-118877488         | rs4129115  | A             | C            | 0.04        | 0.01 | 1.16E-04 | 0.818                         |
| 8-118877198         | rs4129116  | A             | T            | 0.03        | 0.01 | 2.39E-04 | 0.850                         |
| 8-118879406         | rs62521109 | A             | G            | -0.03       | 0.01 | 1.82E-04 | 0.810                         |
| 8-118850101         | rs66732486 | A             | G            | -0.04       | 0.01 | 3.40E-05 | 0.945                         |
| 8-118830036         | rs7000499  | T             | C            | -0.03       | 0.01 | 0.002    | 0.895                         |

\* Reference AF GWAS<sup>11</sup>

**Supplementary Table III. Association between AF and predicted gene expression levels of *VGLL2* and *EXT1* across 49 GTEx\* tissues**

| <b>Gene</b>  | <b>P value for association between predicted expression and AF across tissues</b> | <b>Number of tissues available for this gene</b> | <b>Most significant tissue</b> | <b>P value in the most significant tissue</b> |
|--------------|-----------------------------------------------------------------------------------|--------------------------------------------------|--------------------------------|-----------------------------------------------|
| <i>VGLL2</i> | 0.17                                                                              | 6                                                | Adipose (Visceral Omentum)     | 0.08                                          |
| <i>EXT1</i>  | 0.04                                                                              | 25                                               | Whole Blood                    | 0.05                                          |

\* GTEx: The Genotype-Tissue Expression (GTEx) project<sup>52</sup>

## Supplementary Table IV. Risk loci in CHARGE-AF risk GWAS

| rsID              | Chr-Position (hg19) | Effect / Reference Allele | Effect Allele Frequency | Beta  | Se    | P        | Imp Qual | Function                          | Nearest gene   | eQTL for gene(s) in heart tissues | prior GWAS associations                                                                                          | GWAS associations reported for high LD SNVs                                                                                                                                                                                                                                                                                                                                                                                                                                                                                                                                                                                                                                                                                                                                                                                                                                                                                                                                                                                                                                                                                                                                                                                                                                                                                                                                                                                                                 |
|-------------------|---------------------|---------------------------|-------------------------|-------|-------|----------|----------|-----------------------------------|----------------|-----------------------------------|------------------------------------------------------------------------------------------------------------------|-------------------------------------------------------------------------------------------------------------------------------------------------------------------------------------------------------------------------------------------------------------------------------------------------------------------------------------------------------------------------------------------------------------------------------------------------------------------------------------------------------------------------------------------------------------------------------------------------------------------------------------------------------------------------------------------------------------------------------------------------------------------------------------------------------------------------------------------------------------------------------------------------------------------------------------------------------------------------------------------------------------------------------------------------------------------------------------------------------------------------------------------------------------------------------------------------------------------------------------------------------------------------------------------------------------------------------------------------------------------------------------------------------------------------------------------------------------|
| rs683600          | 1-172185145         | T/A                       | 0.32                    | 0.01  | 0.002 | 2.49E-08 | 0.941    | intronic                          | <i>DNM3</i>    |                                   | No association reported in GWAS catalog                                                                          |                                                                                                                                                                                                                                                                                                                                                                                                                                                                                                                                                                                                                                                                                                                                                                                                                                                                                                                                                                                                                                                                                                                                                                                                                                                                                                                                                                                                                                                             |
| rs59985551        | 2-56106928          | T/C                       | 0.23                    | -0.02 | 0.003 | 4.97E-08 | 0.999    | intronic                          | <i>EFEMP1</i>  |                                   | Fat-free body mass, Hip circumference adjusted for BMI, Waist circumference adjusted for body mass index, Height | Inguinal hernia, Height, Waist circumference adjusted for body mass index, Joint mobility (Beighton score), Hip circumference adjusted for BMI, Optic cup area, Waist circumference adjusted for BMI (adjusted for smoking behaviour), Waist circumference adjusted for BMI (joint analysis main effects and smoking interaction), Waist circumference adjusted for BMI in non-smokers, Waist circumference adjusted for BMI in smokers, Waist circumference adjusted for BMI (joint analysis main effects and physical activity interaction), Waist circumference adjusted for BMI in active individuals, Lung function (FVC), Body fat distribution (arm fat ratio), Body fat distribution (leg fat ratio), Body fat distribution (trunk fat ratio), FEV1, Lung function (FEV1/FVC), Carpal tunnel syndrome, Fat-free mass                                                                                                                                                                                                                                                                                                                                                                                                                                                                                                                                                                                                                                |
| 3:141112859_CTT_C | 3-141112859         | C/CTT                     | 0.43                    | 0.02  | 0.002 | 5.80E-11 | 0.998    | intronic                          | <i>ZBTB38</i>  |                                   | No association reported in GWAS catalog                                                                          | Myopia (age of diagnosis), Spherical equivalent or myopia (age of diagnosis), Height, Waist circumference, Estimated glomerular filtration rate, Blond vs. brown/black hair color, Body fat distribution (arm fat ratio), Body fat distribution (leg fat ratio), Body fat distribution (trunk fat ratio), Prostate cancer, Pulmonary function in asthmatics, Infant length, Hip circumference adjusted for BMI, Crohn's disease, Fat-free mass, Hip circumference, Waist circumference adjusted for BMI (joint analysis main effects and physical activity interaction), Waist circumference adjusted for BMI in active individuals, Waist circumference adjusted for BMI in inactive individuals, Waist circumference adjusted for body mass index, Eczema, Red blood cell count, Highest math class taken (MTAG), Waist circumference adjusted for BMI (adjusted for smoking behaviour), Waist circumference adjusted for BMI (joint analysis main effects and smoking interaction), Waist circumference adjusted for BMI in non-smokers, Waist circumference adjusted for BMI in smokers, Hair color, Prostate-specific antigen levels (conditioned on lead SNPs), Heel bone mineral density, Multiple sclerosis, Lymphocyte counts, Lymphocyte percentage of white cells, Educational attainment (years of education), Educational attainment (MTAG), Male-pattern baldness, Balding type 1, Chronic obstructive pulmonary disease, Lung function (FVC) |
| rs140218463       | 3-100283593         | T/G                       | 0.001                   | 0.23  | 0.039 | 4.51E-09 | 0.980    | intronic                          | <i>TMEM45A</i> |                                   | No association reported in GWAS catalog                                                                          |                                                                                                                                                                                                                                                                                                                                                                                                                                                                                                                                                                                                                                                                                                                                                                                                                                                                                                                                                                                                                                                                                                                                                                                                                                                                                                                                                                                                                                                             |
| rs10946808        | 6-26233387          | G/A                       | 0.28                    | -0.02 | 0.003 | 3.27E-13 | 1.000    | Noncoding transcript exon variant | <i>H2AC9P</i>  |                                   | Height, Physical activity measurement                                                                            | Body fat percentage, Height, Cigarettes smoked per day (MTAG), Smoking behaviour (cigarettes smoked per day), Birth weight, Serum urate levels in chronic kidney disease, Hip circumference, Hip circumference adjusted for BMI, Waist circumference, Waist circumference adjusted for BMI (joint analysis main effects and physical activity interaction), Waist circumference adjusted for BMI in active individuals, Waist circumference adjusted for body mass index, Parental longevity (combined parental attained age, Martingale residuals), Strenuous sports or other exercises, Body fat                                                                                                                                                                                                                                                                                                                                                                                                                                                                                                                                                                                                                                                                                                                                                                                                                                                          |

|                   |             |               |      |       |       |          |       |                                               |          |         |                                                                                                                                                                                                                                                                                                                            |                                                                                                                                                                                                                                                                                                                                                                                                                                                                                                                                                                                            |
|-------------------|-------------|---------------|------|-------|-------|----------|-------|-----------------------------------------------|----------|---------|----------------------------------------------------------------------------------------------------------------------------------------------------------------------------------------------------------------------------------------------------------------------------------------------------------------------------|--------------------------------------------------------------------------------------------------------------------------------------------------------------------------------------------------------------------------------------------------------------------------------------------------------------------------------------------------------------------------------------------------------------------------------------------------------------------------------------------------------------------------------------------------------------------------------------------|
|                   |             |               |      |       |       |          |       |                                               |          |         |                                                                                                                                                                                                                                                                                                                            | distribution (leg fat ratio), Body fat distribution (trunk fat ratio), Worry too long after an embarrassing experience                                                                                                                                                                                                                                                                                                                                                                                                                                                                     |
| rs202228093       | 6-34205465  | GGAGC<br>CC/G | 0.90 | -0.03 | 0.004 | 1.49E-10 | 0.975 | intronic                                      | HMGA1    |         | Hip circumference adjusted for BMI, Waist circumference adjusted for body mass index, Height                                                                                                                                                                                                                               | Height, Waist-to-hip ratio adjusted for body mass index, Waist circumference adjusted for body mass index, Waist circumference adjusted for BMI (adjusted for smoking behaviour), Waist circumference adjusted for BMI (joint analysis main effects and smoking interaction), Waist circumference adjusted for BMI in non-smokers, Waist circumference adjusted for BMI (joint analysis main effects and physical activity interaction), Waist circumference adjusted for BMI in active individuals, Anthropometric traits, Anthropometric traits (multi-trait analysis)                   |
| rs7740107         | 6-130374461 | A/T           | 0.74 | -0.02 | 0.003 | 3.92E-09 | 0.998 | intronic                                      | L3MBTL3  | L3MBTL3 | Height, Red blood cell count, Hematocrit, Appendicular lean mass, Estimated glomerular filtration rate, Body mass index, Hemoglobin, Liver enzyme levels (alkaline phosphatase), Immature fraction of reticulocytes, Hip circumference adjusted for BMI, Lymphocyte counts, Chronic kidney disease, White blood cell count | Fat-free mass, Height, Body mass index, Hip circumference, Lymphocyte counts, Breast cancer, Breast cancer (estrogen-receptor negative), Hair color, Waist-hip ratio, Hip circumference adjusted for BMI, Spherical equivalent or myopia (age of diagnosis), Heel bone mineral density, C-reactive protein levels, Hematocrit, White blood cell count, Red blood cell count, Multiple sclerosis                                                                                                                                                                                            |
| rs55901622        | 6-127157438 | G/A           | 0.27 | -0.02 | 0.003 | 5.04E-09 | 0.998 | intronic                                      | HLA-DMB  |         | Hip circumference adjusted for BMI                                                                                                                                                                                                                                                                                         | Bone mineral density (paediatric, upper limb), Intelligence, Femoral neck bone mineral density, Bone mineral density, Bone mineral density (paediatric, total body less head), Total body bone mineral density                                                                                                                                                                                                                                                                                                                                                                             |
| rs552707          | 7-28205303  | C/T           | 0.71 | -0.02 | 0.003 | 8.39E-14 | 0.999 | intronic                                      | JAZF1    |         | BMI-adjusted waist circumference, Physical activity measurement, Height                                                                                                                                                                                                                                                    | Height, Hip circumference adjusted for BMI, Waist circumference adjusted for BMI (joint analysis main effects and physical activity interaction), Waist circumference adjusted for BMI in active individuals, Waist circumference adjusted for body mass index, Body fat distribution (arm fat ratio), Body fat distribution (leg fat ratio), Body fat distribution (trunk fat ratio), Fat-free mass                                                                                                                                                                                       |
| rs481237          | 9-98316094  | A/G           | 0.09 | -0.02 | 0.004 | 3.47E-08 | 0.948 | intergenic                                    | PTCH1    |         | BMI-adjusted hip circumference, BMI-adjusted waist circumference                                                                                                                                                                                                                                                           |                                                                                                                                                                                                                                                                                                                                                                                                                                                                                                                                                                                            |
| rs10878349        | 12-66327632 | G/A           | 0.51 | -0.01 | 0.002 | 4.20E-09 | 0.994 | intronic                                      | HMGA2    |         | Systolic blood pressure, Cortical surface area                                                                                                                                                                                                                                                                             | Brain structure, Pulse pressure, Systolic blood pressure, Height, Birth length, Hip circumference, Hip circumference adjusted for BMI, Birth weight, Head circumference (infant), White blood cell count, Chronic obstructive pulmonary disease or resting heart rate (pleiotropy), Infant length, Waist circumference adjusted for body mass index, Waist circumference adjusted for BMI (adjusted for smoking behaviour), Waist circumference adjusted for BMI (joint analysis main effects and smoking interaction), Waist circumference adjusted for BMI in non-smokers, Fat-free mass |
| rs28559926        | 15-89400043 | C/G           | 0.04 | -0.04 | 0.006 | 1.13E-09 | 0.926 | missense variant,<br>NP_001126.3:p.Glu1409Asp | ACAN     |         | BMI-adjusted waist circumference                                                                                                                                                                                                                                                                                           | Height, Hip circumference adjusted for BMI, Fat-free mass, Body fat distribution (arm fat ratio), Body fat distribution (leg fat ratio), Body fat distribution (trunk fat ratio)                                                                                                                                                                                                                                                                                                                                                                                                           |
| 15:84575867_AAG_A | 15-84575867 | A/AAG         | 0.53 | 0.01  | 0.002 | 1.22E-08 | 0.996 | intronic                                      | ADAMTSL3 |         | No association reported in GWAS catalog                                                                                                                                                                                                                                                                                    | Height, Hip circumference adjusted for BMI, Waist circumference adjusted for body mass index, Waist circumference adjusted for BMI (adjusted for smoking behaviour), Waist circumference adjusted for BMI (joint analysis main effects and smoking interaction), Waist circumference adjusted for BMI in non-smokers, Waist circumference adjusted for BMI (joint analysis main effects and physical activity interaction), Waist circumference adjusted for BMI in active individuals, Hip circumference, Body fat distribution (arm fat ratio), Body fat distribution (leg fat ratio),   |

|             |             |     |       |       |       |          |       |                     |         |                              |                                                                                                                                                                                                                                                                                                                                                                                                                                                                                                                                                   |                                                                                                                                                                                                                                                                                                                                                                                                                                                                                                                                                                                                                                                                                                                                                                                                                                                                                                                 |
|-------------|-------------|-----|-------|-------|-------|----------|-------|---------------------|---------|------------------------------|---------------------------------------------------------------------------------------------------------------------------------------------------------------------------------------------------------------------------------------------------------------------------------------------------------------------------------------------------------------------------------------------------------------------------------------------------------------------------------------------------------------------------------------------------|-----------------------------------------------------------------------------------------------------------------------------------------------------------------------------------------------------------------------------------------------------------------------------------------------------------------------------------------------------------------------------------------------------------------------------------------------------------------------------------------------------------------------------------------------------------------------------------------------------------------------------------------------------------------------------------------------------------------------------------------------------------------------------------------------------------------------------------------------------------------------------------------------------------------|
|             |             |     |       |       |       |          |       |                     |         |                              |                                                                                                                                                                                                                                                                                                                                                                                                                                                                                                                                                   | Body fat distribution (trunk fat ratio), Appendicular lean mass, Lean body mass, Waist circumference                                                                                                                                                                                                                                                                                                                                                                                                                                                                                                                                                                                                                                                                                                                                                                                                            |
| rs79461387  | 17-29168077 | T/G | 0.26  | -0.02 | 0.003 | 1.76E-08 | 0.986 | intronic            | ATAD5   |                              | Neutrophil percentage of white cells                                                                                                                                                                                                                                                                                                                                                                                                                                                                                                              |                                                                                                                                                                                                                                                                                                                                                                                                                                                                                                                                                                                                                                                                                                                                                                                                                                                                                                                 |
| rs4392169   | 18-20724931 | T/A | 0.79  | 0.02  | 0.003 | 4.48E-12 | 0.999 | intronic            | CABLES1 |                              | No association reported in GWAS catalog                                                                                                                                                                                                                                                                                                                                                                                                                                                                                                           | Heel bone mineral density, Lung function (FVC), FEV1, Height, Scalp hair shape, Fat-free mass, Body fat distribution (leg fat ratio), Body fat distribution (trunk fat ratio), Waist circumference adjusted for BMI (joint analysis main effects and physical activity interaction), Waist circumference adjusted for BMI in active individuals, Lung function (FEV1), Telomere length, Waist circumference adjusted for body mass index, Waist circumference adjusted for BMI (adjusted for smoking behaviour), Waist circumference adjusted for BMI (joint analysis main effects and smoking interaction), Waist circumference adjusted for BMI in non-smokers, Waist circumference adjusted for BMI in smokers, Sitting height ratio, Hip circumference adjusted for BMI, Initial pursuit acceleration, Initial pursuit acceleration in psychotic disorders, Waist-hip ratio                                 |
| rs73047219  | 19-41875919 | G/C | 0.08  | 0.03  | 0.004 | 3.99E-09 | 0.994 | intronic            | TMEM91  |                              | No association reported in GWAS catalog                                                                                                                                                                                                                                                                                                                                                                                                                                                                                                           |                                                                                                                                                                                                                                                                                                                                                                                                                                                                                                                                                                                                                                                                                                                                                                                                                                                                                                                 |
| rs117700741 | 19-8637832  | T/C | 0.04  | -0.04 | 0.006 | 2.65E-08 | 0.913 | intronic            | MYO1F   |                              | No association reported in GWAS catalog                                                                                                                                                                                                                                                                                                                                                                                                                                                                                                           |                                                                                                                                                                                                                                                                                                                                                                                                                                                                                                                                                                                                                                                                                                                                                                                                                                                                                                                 |
| rs143384    | 20-34025756 | G/A | 0.41  | 0.02  | 0.002 | 1.39E-20 | 1.000 | 5 Prime UTR variant | GDF5    | UQCC1, RPL36P4, NORAD, EDEM2 | BMI-adjusted hip circumference, Height, Body fat distribution, Fat-free body mass, BMI-adjusted waist-hip ratio, Knee osteoarthritis, Hip circumference, Appendicular lean mass, Weight, grip strength measurement, Lung function, Joint mobility, forced expiratory volume, Peak expiratory flow, Subcortical volume, Walking pace, Femoral neck size, Trochanter size, Intertrochanteric region size, Spine bone size, Hip bone size, Knee pain, Brain region volumes, Developmental dysplasia of the hip, Anthropometric traits, Infant length | Height, Waist-to-hip ratio adjusted for BMI (joint analysis for main effect and physical activity interaction), Waist-to-hip ratio adjusted for BMI in active individuals, QRS interval (sulfonylurea treatment interaction), Spine bone size, Developmental dysplasia of the hip, Osteoarthritis, Waist-to-hip ratio adjusted for body mass index, Waist-to-hip ratio adjusted for BMI (additive genetic model), Waist-to-hip ratio adjusted for BMI, Waist-to-hip ratio adjusted for BMI x sex x age interaction (4df test), Pulse pressure, Infant length, Joint mobility (Beighton score), Hip circumference, Hip circumference adjusted for BMI, Knee osteoarthritis, Fat-free mass, Lung function (FVC), Waist-hip ratio, Body fat distribution (leg fat ratio), Body fat distribution (trunk fat ratio), FEV1, Peak expiratory flow, Anthropometric traits, Anthropometric traits (multi-trait analysis) |
| rs73901538  | 20-20383074 | T/C | 0.002 | 0.22  | 0.041 | 4.26E-08 | 0.623 | intronic            | RALGAP2 |                              | No association reported in GWAS catalog                                                                                                                                                                                                                                                                                                                                                                                                                                                                                                           |                                                                                                                                                                                                                                                                                                                                                                                                                                                                                                                                                                                                                                                                                                                                                                                                                                                                                                                 |

Genetic variants at risk loci independently associated with ECG-AI predicted 5-year AF risk.

**rsID:** variant ID; **Chr:** chromosome; **hg19:** genomic position based on build hg19; **Beta:** effect size of effect allele; **Se:** standard error; **P:** P-value in GWAS; **Imp Qual:** imputation quality.

**eQTL for gene(s) in heart tissues:** eQTL reported by the GTEx V8 data in Heart - Atrial Appendage tissue or Heart - Left Ventricle tissue.

**GWAS associations reported for high LD SNVs:** Traits associated with SNVs in high linkage disequilibrium ( $r^2 \geq 0.7$ ) with the lead SNV as reported in GWAS catalog.

## Supplementary Table V. Traits associated with lead SNVs identified in the CHARGE GWAS

| CHARGE-AF variables | SNVs                           | Associated traits       | PMID                                                       |
|---------------------|--------------------------------|-------------------------|------------------------------------------------------------|
| Age                 |                                |                         |                                                            |
| Race                |                                |                         |                                                            |
| Height              | rs10946808                     | Height                  | 18391951, 18391950, 19343178                               |
|                     | rs7740107                      | Height, Body mass index | 25282103                                                   |
|                     | rs552707                       | Height                  | 25282103                                                   |
|                     | rs143384                       | Height                  | 20881960, 25282103                                         |
|                     | rs4146922 (rs59985551)         | Height                  | 25429064                                                   |
|                     | rs3791679 (rs59985551)         | Height                  | 18391951, 20189936, 23563607, 25282103                     |
|                     | rs3791675 (rs59985551)         | Height                  | 18391952, 19396169, 19893584, 20397748, 20881960, 25429064 |
|                     | rs6440003 (3:141112859_CTT_C)  | Height                  | 18391952, 21998595                                         |
|                     | rs6763931 (3:141112859_CTT_C)  | Height                  | 18391951, 19343178, 25429064                               |
|                     | rs724016 (3:141112859_CTT_C)   | Height                  | 18391950, 18193045, 20881960, 25282103                     |
|                     | rs1991431 (3:141112859_CTT_C)  | Height                  | 23563607, 28270201                                         |
|                     | rs7766641 (rs10946808)         | Height                  | 28270201                                                   |
|                     | rs806794 (rs10946808)          | Height                  | 20881960, 23563607, 25429064, 25282103                     |
|                     | rs12214804 (rs202228093)       | Height                  | 25282103                                                   |
|                     | rs1776897 (rs202228093)        | Height                  | 18391951, 19343178, 20397748, 25429064                     |
|                     | rs2780226 (rs202228093)        | Height                  | 20881960                                                   |
|                     | rs1150781 (rs202228093)        | Height                  | 21998595                                                   |
|                     | rs6569648 (rs7740107)          | Height                  | 20881960                                                   |
|                     | rs6899976 (rs7740107)          | Height                  | 18391951                                                   |
|                     | rs849141 (rs552707)            | Height                  | 19343178                                                   |
|                     | rs1029534 (rs552707)           | Height                  | 23563607                                                   |
|                     | rs1708299 (rs552707)           | Height                  | 20881960                                                   |
|                     | rs1351394 (rs10878349)         | Height                  | 20881960, 23563607                                         |
|                     | rs1042725 (rs10878349)         | Height                  | 18391950, 18391952, 17767157, 25429064                     |
|                     | rs8756 (rs10878349)            | Height                  | 18391951, 19343178, 20397748, 25282103                     |
|                     | rs7968682 (rs10878349)         | Height                  | 22021425                                                   |
|                     | rs7162542 (15:84575867_AAG_A)  | Height                  | 25282103                                                   |
|                     | rs2401171 (15:84575867_AAG_A)  | Height                  | 25429064                                                   |
|                     | rs10906982 (15:84575867_AAG_A) | Height                  | 18391952, 20397748                                         |



|                                 |                                |                                         |                              |
|---------------------------------|--------------------------------|-----------------------------------------|------------------------------|
|                                 | rs7183263 (15:84575867_AAG_A)  | Height                                  | 20397748                     |
|                                 | rs11259933 (15:84575867_AAG_A) | Height                                  | 23563607                     |
|                                 | rs11259936 (15:84575867_AAG_A) | Height                                  | 20881960                     |
|                                 | rs4842838 (15:84575867_AAG_A)  | Height                                  | 19343178, 20189936           |
|                                 | rs16942341 (rs28559926)        | Height                                  | 20881960                     |
|                                 | rs8096254 (rs4392169)          | Height                                  | 28270201                     |
|                                 | rs4800148 (rs4392169)          | Height                                  | 18391951                     |
|                                 | rs4800452 (rs4392169)          | Height                                  | 20881960                     |
|                                 | rs4369779 (rs4392169)          | Height                                  | 20189936, 25429064, 25282103 |
|                                 | rs6060355 (rs143384)           | Height                                  | 28270201                     |
|                                 | rs6060369 (rs143384)           | Height                                  | 18391950, 18193045, 25429064 |
|                                 | rs6060373 (rs143384)           | Height                                  | 18391952                     |
|                                 | rs6088813 (rs143384)           | Height                                  | 19343178                     |
|                                 | rs6060402 (rs143384)           | Height                                  | 28270201                     |
|                                 | rs224329 (rs143384)            | Height                                  | 25429064                     |
|                                 | rs224333 (rs143384)            | Height                                  | 23563607                     |
| <b>Weight</b>                   | <b>rs59985551</b>              | Fat-free body mass                      | 30593698                     |
|                                 | <b>rs143384</b>                | Fat-free body mass                      | 30593698                     |
|                                 | rs724016 (3:141112859_CTT_C)   | Fat-free mass                           | 30593698                     |
|                                 | rs7740188 (rs7740107)          | Fat-free mass                           | 30593698                     |
|                                 | rs6569648 (rs7740107)          | Body mass index                         | 25673413, 30108127           |
|                                 | rs9375702 (rs7740107)          | Body mass index                         | 30595370                     |
|                                 | rs508347 (rs552707)            | Fat-free mass                           | 30593698                     |
|                                 | rs9669278 (rs10878349)         | Fat-free mass                           | 30593698                     |
|                                 | rs16942341 (rs28559926)        | Fat-free mass                           | 30593698                     |
|                                 | rs4800148 (rs4392169)          | Fat-free mass                           | 30593698                     |
| <b>Systolic Blood Pressure</b>  | rs10784502 (rs10878349)        | Systolic blood pressure, Pulse pressure | 27841878                     |
|                                 | rs7970350 (rs10878349)         | Systolic blood pressure                 | 30595370                     |
|                                 | rs113744258 (rs10878349)       | Systolic blood pressure, Pulse pressure | 30578418                     |
| <b>Diastolic Blood Pressure</b> | rs10784502 (rs10878349)        | Pulse pressure                          | 27841878                     |
|                                 | rs113744258 (rs10878349)       | Pulse pressure                          | 30578418                     |
|                                 | rs7312464 (rs10878349)         | Pulse pressure                          | 28135244                     |
|                                 | rs6142381 (rs143384)           | Pulse pressure                          | 30578418                     |

|                                        |                        |                                               |          |
|----------------------------------------|------------------------|-----------------------------------------------|----------|
| <b>Smoking</b>                         | rs7766641 (rs10946808) | Smoking behaviour (cigarettes smoked per day) | 30643251 |
| <b>Antihypertensive medication use</b> |                        |                                               |          |
| <b>Diabetes</b>                        |                        |                                               |          |
| <b>Heart failure</b>                   |                        |                                               |          |
| <b>Myocardial infarction</b>           |                        |                                               |          |

**Supplementary Table VI. Summary statistics of the independent significant lead single nucleotide variants (SNVs) from each GWAS in the other GWAS.**

| <b>SNVs in ECG-AI risk GWAS</b> | <b>Genome Position (hg19)</b> | <b>Beta (se) in ECG-AI risk GWAS</b> | <b>P in ECG-AI risk GWAS</b> | <b>Beta (se) in CHARGE risk GWAS</b> | <b>P in CHARGE risk GWAS</b> |
|---------------------------------|-------------------------------|--------------------------------------|------------------------------|--------------------------------------|------------------------------|
| rs2627040                       | 2-179601975                   | 0.077 (0.014)                        | 4.55×10 <sup>-8</sup>        | 0.004 (0.005)                        | 0.47                         |
| rs41312411                      | 3-38621237                    | 0.055 (0.009)                        | 2.79×10 <sup>-10</sup>       | -0.005 (0.003)                       | 0.17                         |
| rs6801957                       | 3-38767315                    | -0.044 (0.006)                       | 2.68×10 <sup>-12</sup>       | -0.007 (0.002)                       | 0.003                        |
| rs9689288                       | 6-117508467                   | 0.043 (0.006)                        | 5.05×10 <sup>-12</sup>       | 0.009 (0.002)                        | 2.97×10 <sup>-4</sup>        |
| rs35186392                      | 8-118857805                   | 0.045 (0.008)                        | 7.22×10 <sup>-9</sup>        | -0.0004 (0.003)                      | 0.90                         |
| <b>SNVs in CHARGE risk GWAS</b> | <b>Genome Position (hg19)</b> | <b>Beta (se) in CHARGE risk GWAS</b> | <b>P in CHARGE risk GWAS</b> | <b>Beta (se) in ECG-AI risk GWAS</b> | <b>P in ECG-AI risk GWAS</b> |
| rs683600                        | 1-172185145                   | 0.015 (0.003)                        | 2.49×10 <sup>-8</sup>        | -0.006 (0.007)                       | 0.40                         |
| rs59985551                      | 2-56106928                    | -0.016 (0.003)                       | 4.97×10 <sup>-8</sup>        | -0.005 (0.007)                       | 0.50                         |
| 3:141112859_CTT_C               | 3-141112859                   | 0.016 (0.002)                        | 5.80×10 <sup>-11</sup>       | -0.016 (0.006)                       | 0.01                         |
| rs140218463                     | 3-100283593                   | 0.228 (0.039)                        | 4.51×10 <sup>-9</sup>        | 0.145 (0.100)                        | 0.15                         |
| rs10946808                      | 6-26233387                    | -0.020 (0.003)                       | 3.27×10 <sup>-13</sup>       | -0.006 (0.007)                       | 0.37                         |
| rs202228093                     | 6-34205465                    | -0.025 (0.004)                       | 1.49×10 <sup>-10</sup>       | -0.020 (0.010)                       | 0.05                         |
| rs7740107                       | 6-130374461                   | -0.016 (0.003)                       | 3.92×10 <sup>-9</sup>        | -0.011 (0.007)                       | 0.12                         |
| rs55901622                      | 6-127157438                   | -0.016 (0.003)                       | 5.04×10 <sup>-9</sup>        | -0.014 (0.007)                       | 0.04                         |
| rs552707                        | 7-28205303                    | -0.020 (0.003)                       | 8.39×10 <sup>-14</sup>       | -0.004 (0.007)                       | 0.58                         |
| rs481237                        | 9-98316094                    | -0.024 (0.004)                       | 3.47×10 <sup>-8</sup>        | -0.025 (0.011)                       | 0.03                         |
| rs10878349                      | 12-66327632                   | -0.014 (0.002)                       | 4.20×10 <sup>-9</sup>        | -0.011 (0.006)                       | 0.09                         |
| rs28559926                      | 15-89400043                   | -0.038 (0.006)                       | 1.13×10 <sup>-9</sup>        | -0.024 (0.016)                       | 0.13                         |
| 15:84575867_AAG_A               | 15-84575867                   | 0.014 (0.002)                        | 1.22×10 <sup>-8</sup>        | 0.008 (0.006)                        | 0.20                         |
| rs79461387                      | 17-29168077                   | -0.015 (0.003)                       | 1.76×10 <sup>-8</sup>        | -0.010 (0.007)                       | 0.15                         |
| rs4392169                       | 18-20724931                   | 0.020 (0.003)                        | 4.48×10 <sup>-12</sup>       | 0.001 (0.007)                        | 0.91                         |
| rs73047219                      | 19-41875919                   | 0.026 (0.004)                        | 3.99×10 <sup>-9</sup>        | 0.018 (0.011)                        | 0.11                         |
| rs117700741                     | 19-8637832                    | -0.036 (0.006)                       | 2.65×10 <sup>-8</sup>        | -0.035 (0.017)                       | 0.04                         |
| rs143384                        | 20-34025756                   | 0.023 (0.002)                        | 1.39×10 <sup>-20</sup>       | -0.0001(0.006)                       | 0.98                         |
| rs73901538                      | 20-20383074                   | 0.223 (0.041)                        | 4.26×10 <sup>-8</sup>        | 0.259 (0.104)                        | 0.01                         |

**Supplementary Table VII. Heritability and genetic correlation estimates for ECG-AI, CHARGE-AF, and previously reported AF GWAS.**

| <b>Traits</b>               | <b><math>h^2</math> (GWAS sumstats)</b> | <b><math>h^2</math> (individual-level data)</b> |
|-----------------------------|-----------------------------------------|-------------------------------------------------|
| ECG-AI risk                 | 7.0% (1.3%)                             | 13.0% (1.4%)                                    |
| CHARGE risk                 | 24.3% (2.1%)                            | 36.5% (1.4%)                                    |
|                             | <b><math>r_g</math> (GWAS sumstats)</b> | <b><math>r_g</math> (individual-level data)</b> |
| AF and ECG-AI risk          | 41.9% (7.3%)                            | 35.3% (13.7%)                                   |
| AF and CHARGE risk          | 28.2% (3.6%)                            | 18.9% (8.6%)                                    |
| ECG-AI risk and CHARGE risk | 50.1% (7.4%)                            | 39.3% (4.5%)                                    |

$h^2$ : heritability; sumstats: summary statistics;  $r_g$ : genetic correlation. The previously reported AF GWAS summary statistics are derived from Roselli et al (2018).<sup>11</sup>

**Supplementary Table VIII. C-index of Cox Proportional Hazard models testing polygenic risk scores of ECG-AI and CHARGE-AF scores**

| <b>Model</b>                          | <b>C-index</b> |
|---------------------------------------|----------------|
| Baseline (age + sex)                  | 0.7373         |
| Baseline + ECG-AI PRS                 | 0.7380         |
| Baseline + CHARGE-AF PRS              | 0.7390         |
| Baseline + ECG-AI PRS + CHARGE-AF PRS | 0.7394         |

**Supplementary Table IX. Polygenic risk and incident AF in a subset of White British participants (N=370,121).**

|                          | Individual models |                        | Interaction model |                        |
|--------------------------|-------------------|------------------------|-------------------|------------------------|
|                          | HR (95% CI)       | P-value                | HR [95% CI]       | P-value                |
| PRS <sub>ECCG-AI</sub>   | 1.08 (1.05-1.10)  | $2.41 \times 10^{-9}$  | 1.07 (1.04-1.10)  | $1.29 \times 10^{-7}$  |
| PRS <sub>CHARGE-AF</sub> | 1.12 (1.09-1.15)  | $3.57 \times 10^{-19}$ | 1.11 (1.09-1.14)  | $1.75 \times 10^{-17}$ |
| Interaction term         |                   |                        | 1.00 (0.98-1.02)  | 0.98                   |

In the individual models, each PRS was tested separately as a predictor of AF, adjusting for age at enrollment, sex, genotyping array, and the first 20 principal components of ancestry. In the interaction model, main effect terms for each PRS were included along with a multiplicative interaction term between each PRS, adjusting for the above covariates. HR: hazard ratio; CI: confidence interval.

**Supplementary Figure I. LocusZoom plots comparing ECG-AI GWAS and reference AF GWAS\* at *VGLL2* and *EXT1* loci**

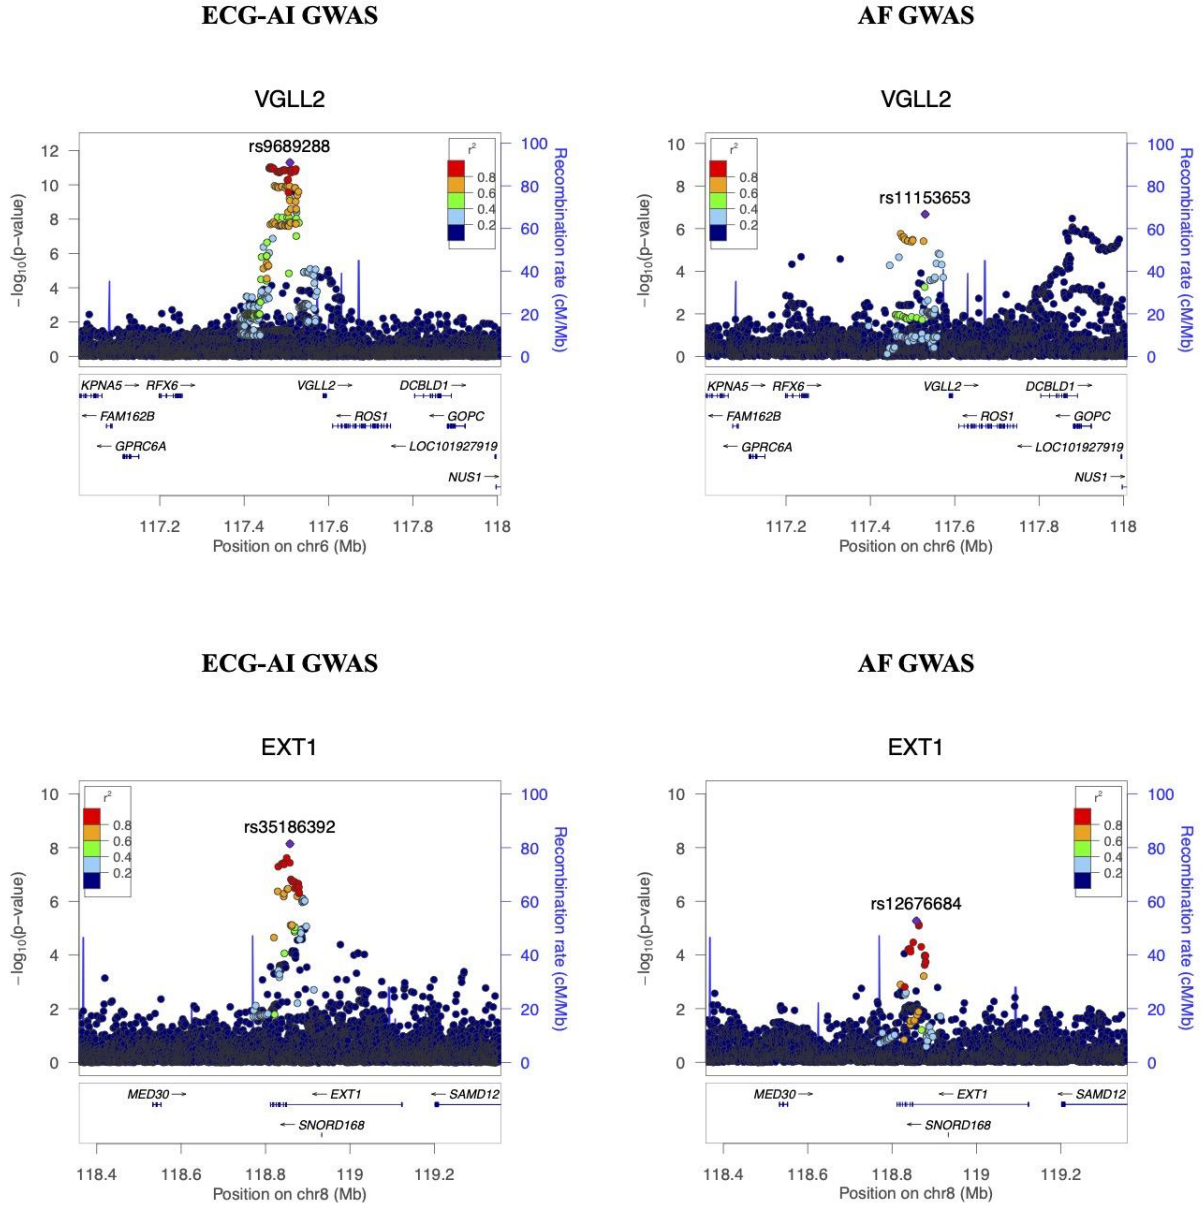

\* Reference AF GWAS<sup>1</sup>

**Supplementary Figure II. LocusZoom plots of significant risk loci in the ECG-AI predicted 5-year AF risk GWAS.**

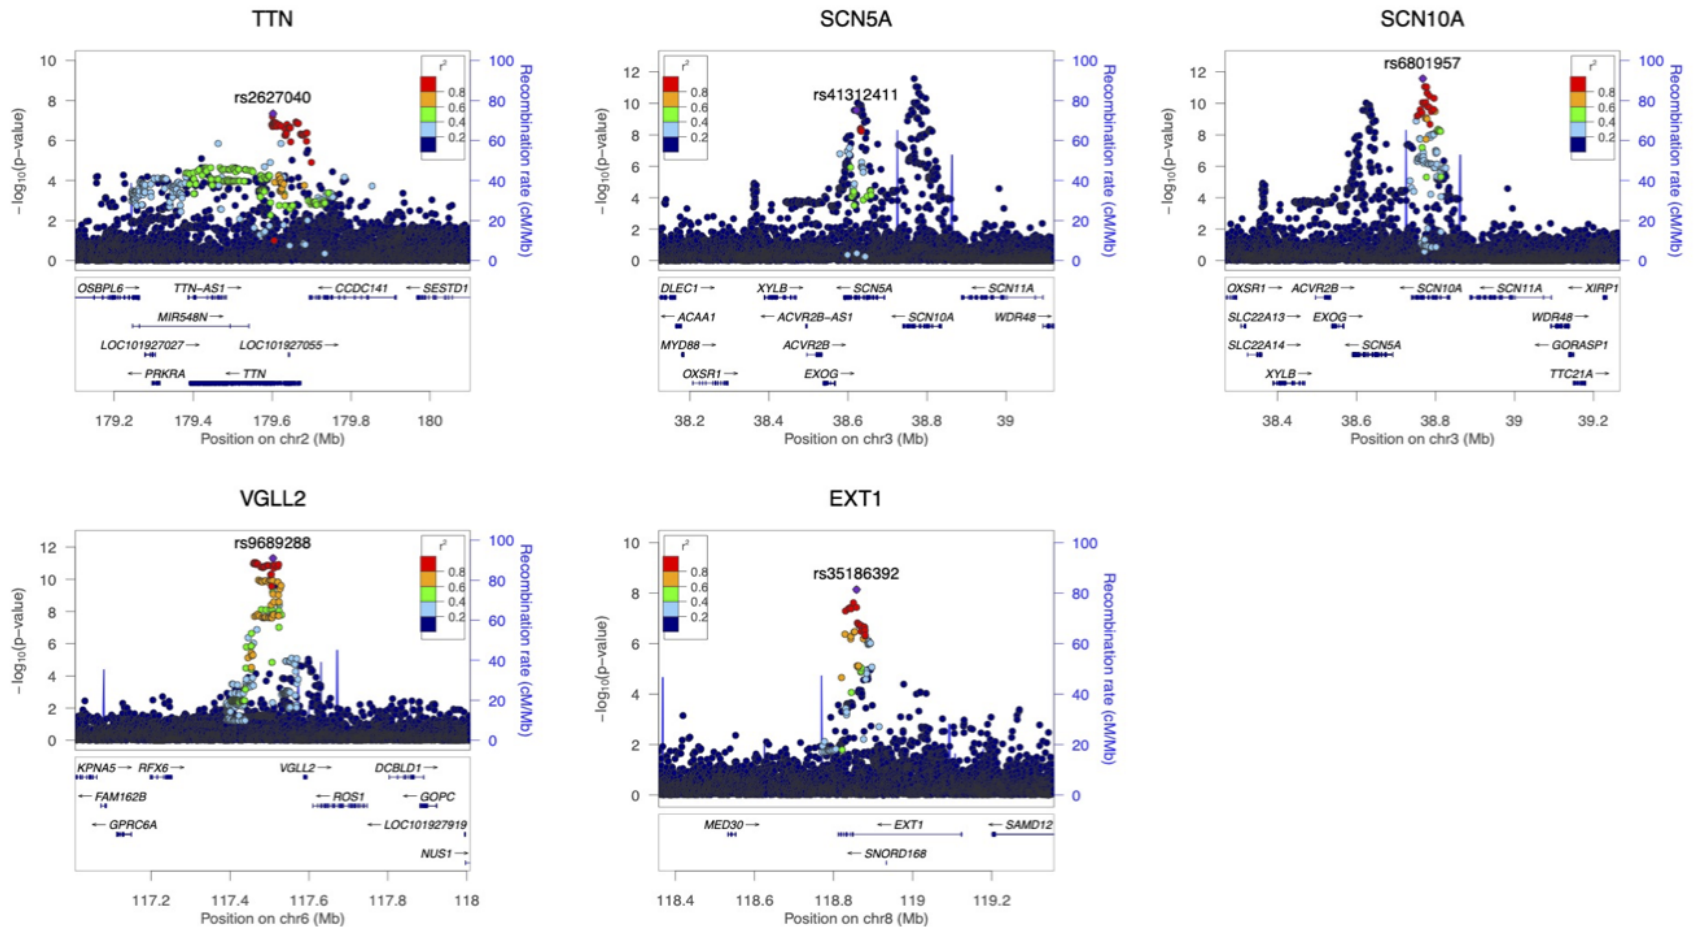



Supplementary Figure III. LocusZoom plots of significant risk loci in the CHARGE-AF predicted 5-year AF risk GWAS.

a

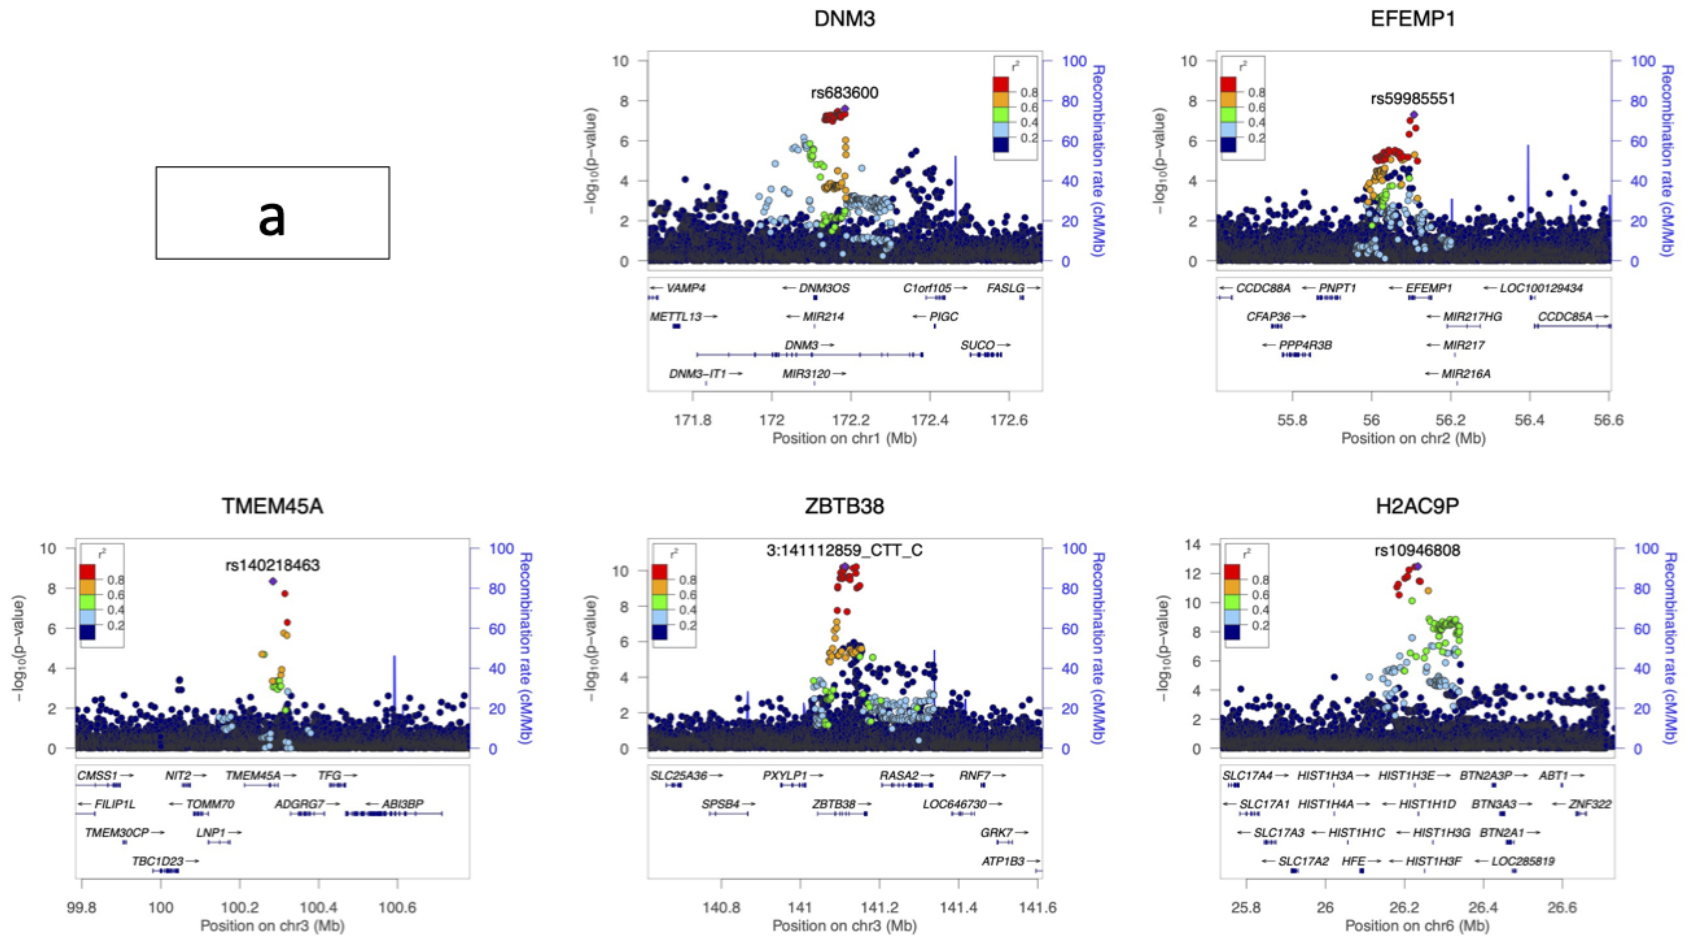

b

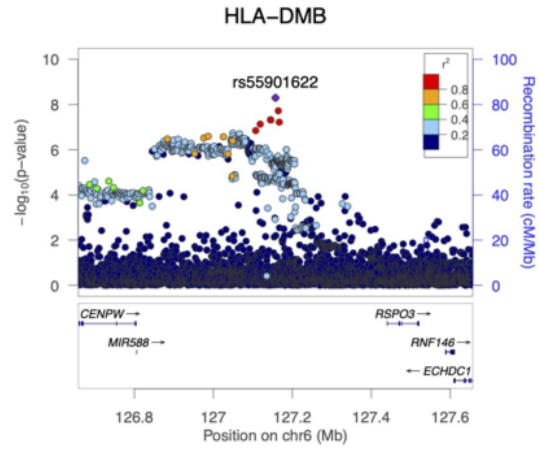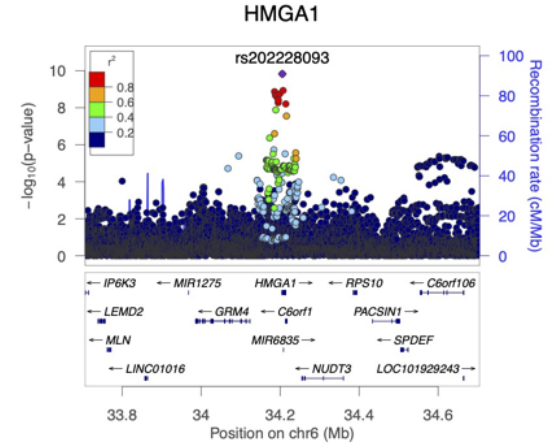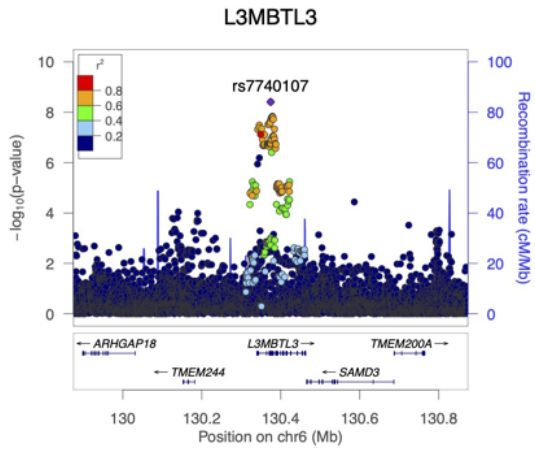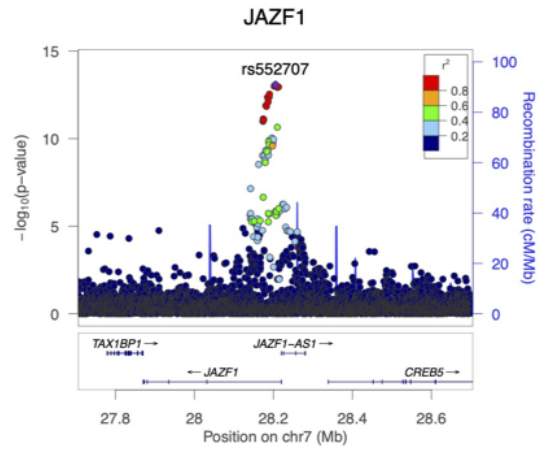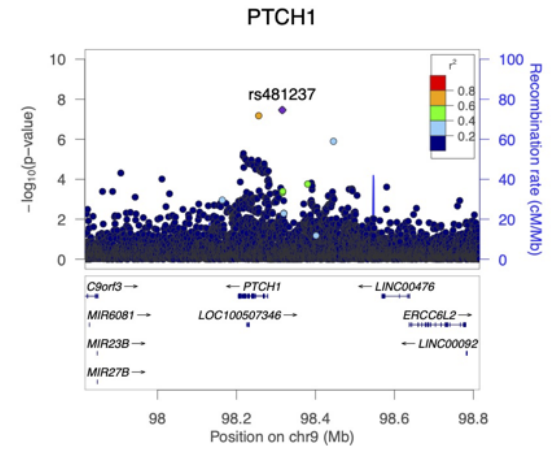

C

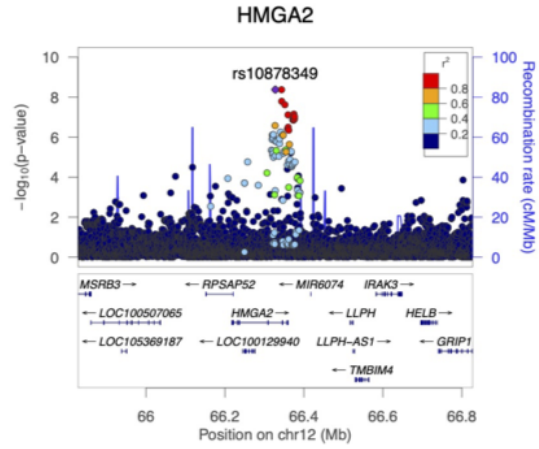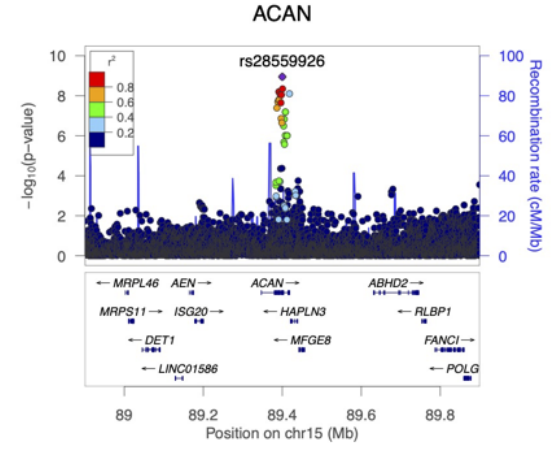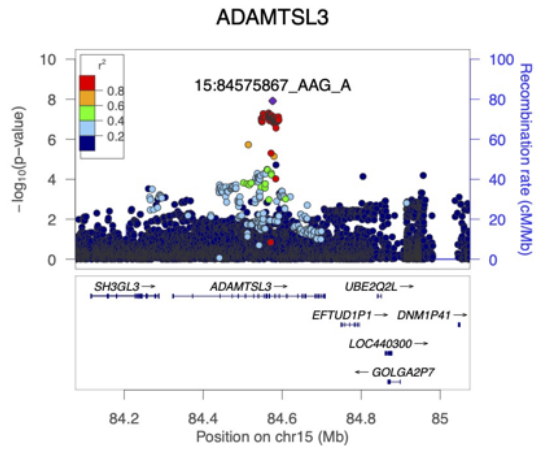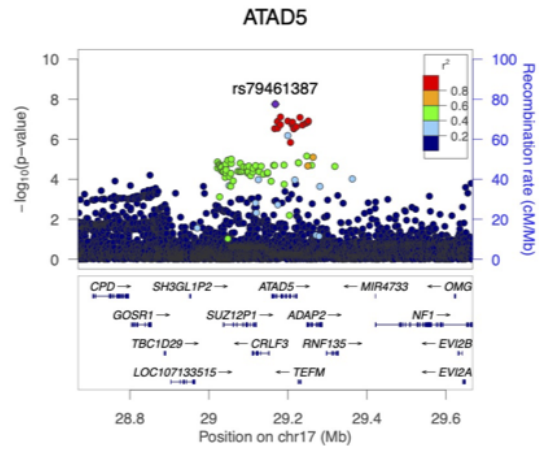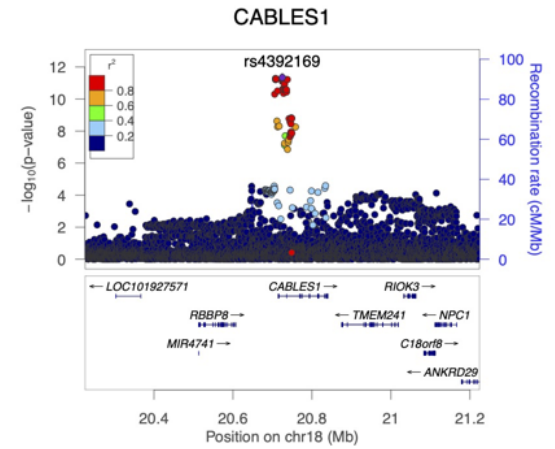

d

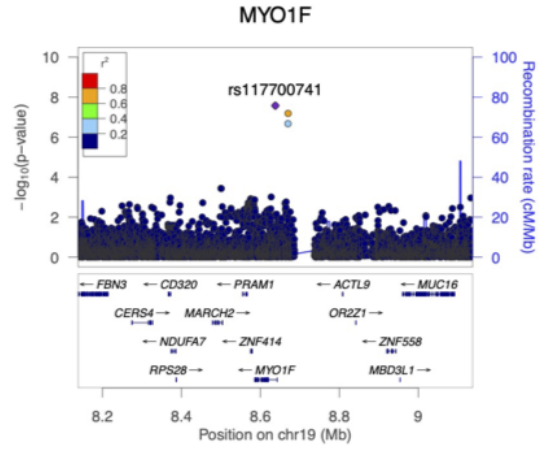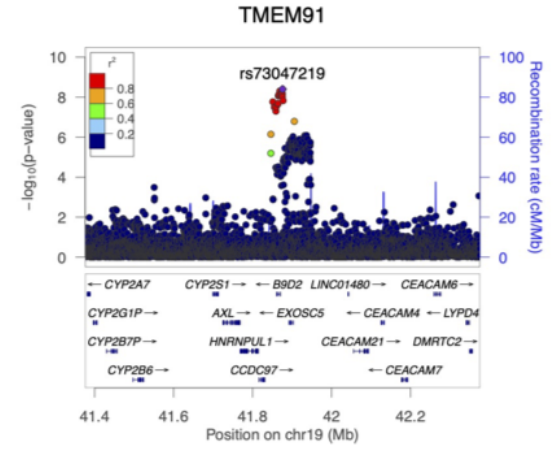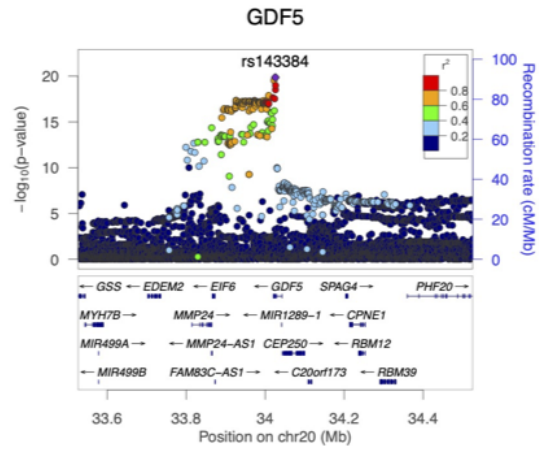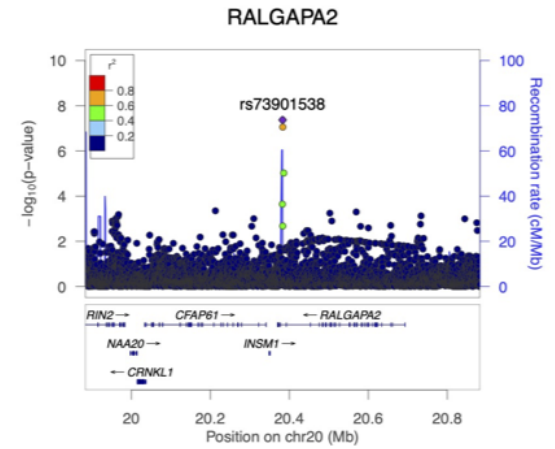

**Supplementary Figure IV. ECG-AI and CHARGE-AF polygenic risk and cumulative incidence of AF.**

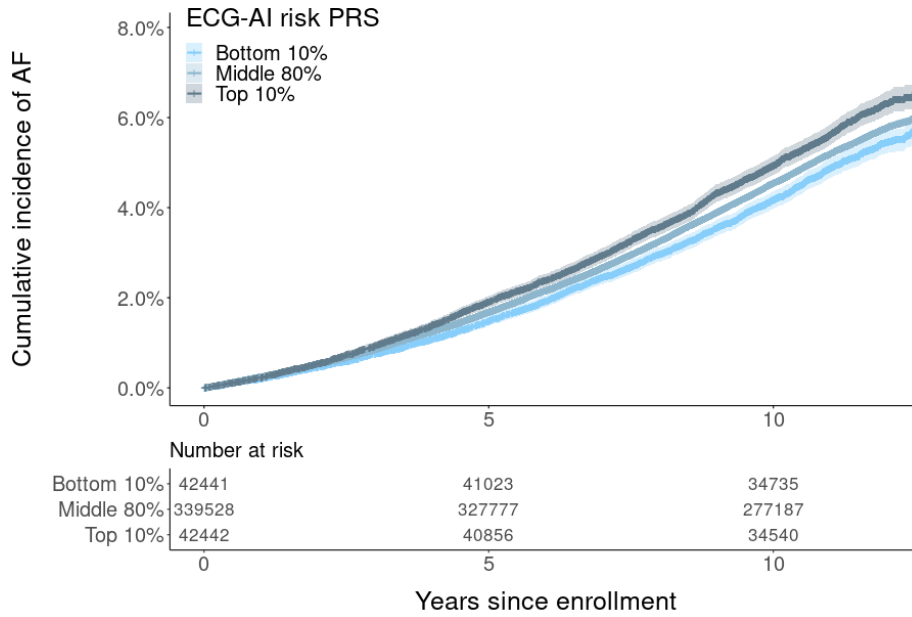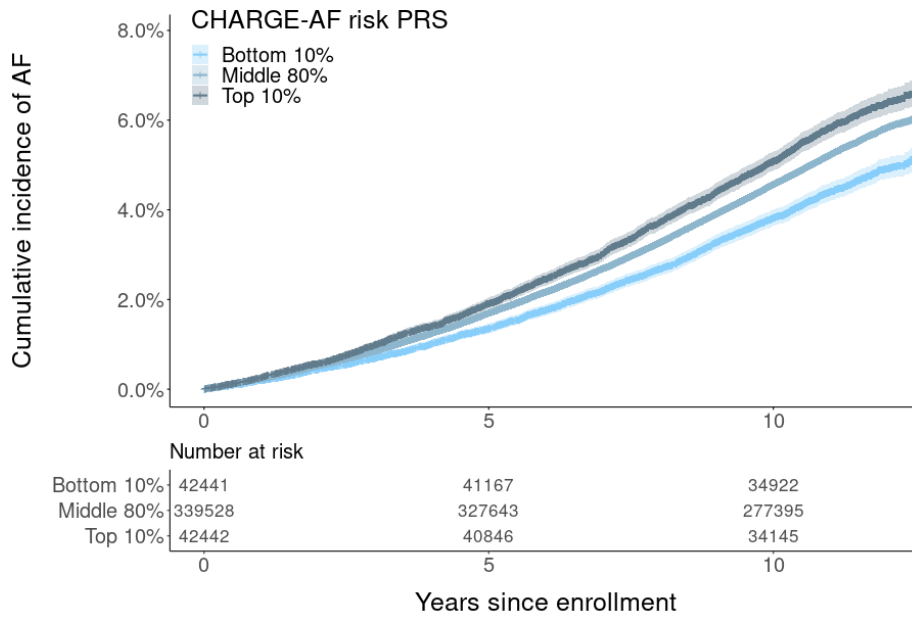

The cumulative incidence of AF is plotted for participants in three risk groups (lowest 10%, middle 80%, and highest 10% of the PRS distribution). Shaded regions around Kaplan-Meier survival estimates represent the 95% confidence intervals.

**Supplementary Figure V. ECG-AI and CHARGE-AF polygenic risk and cumulative incidence of AF in a subset of White British participants**

**(N=370,121).**

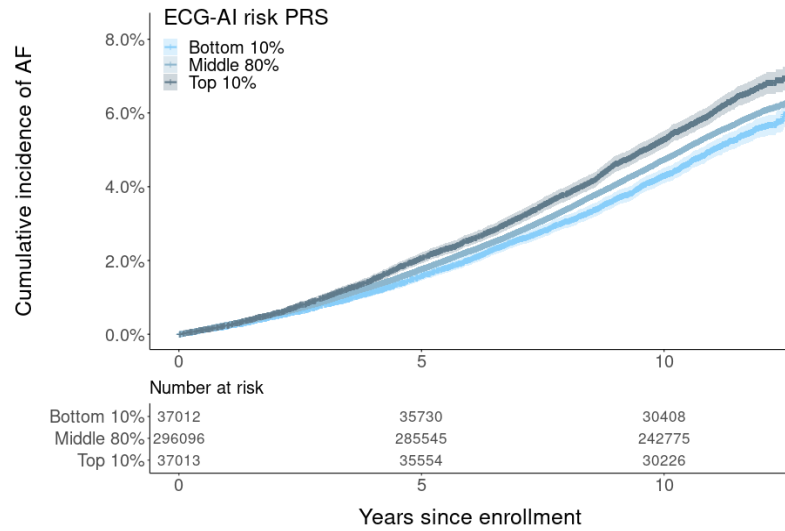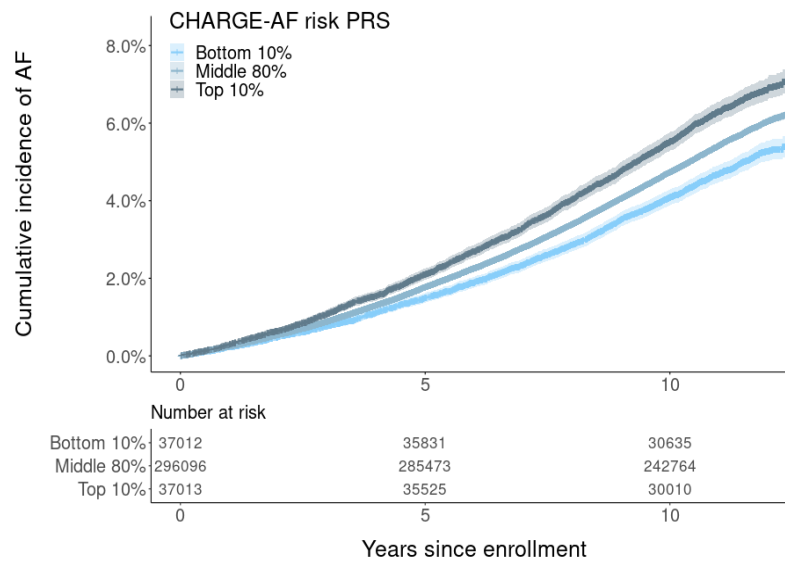

The cumulative incidence of AF is plotted for participants in three risk groups (lowest 10%, middle 80%, and highest 10% of the PRS distribution). Shaded regions around Kaplan-Meier survival estimates represent the 95% confidence intervals.

# Supplementary Figure VI. Median ECG waveforms for individuals at highest and lowest ECG-AI genetic risk at significant loci implicated in ECG-AI

## GWAS

### a. *TTN* region

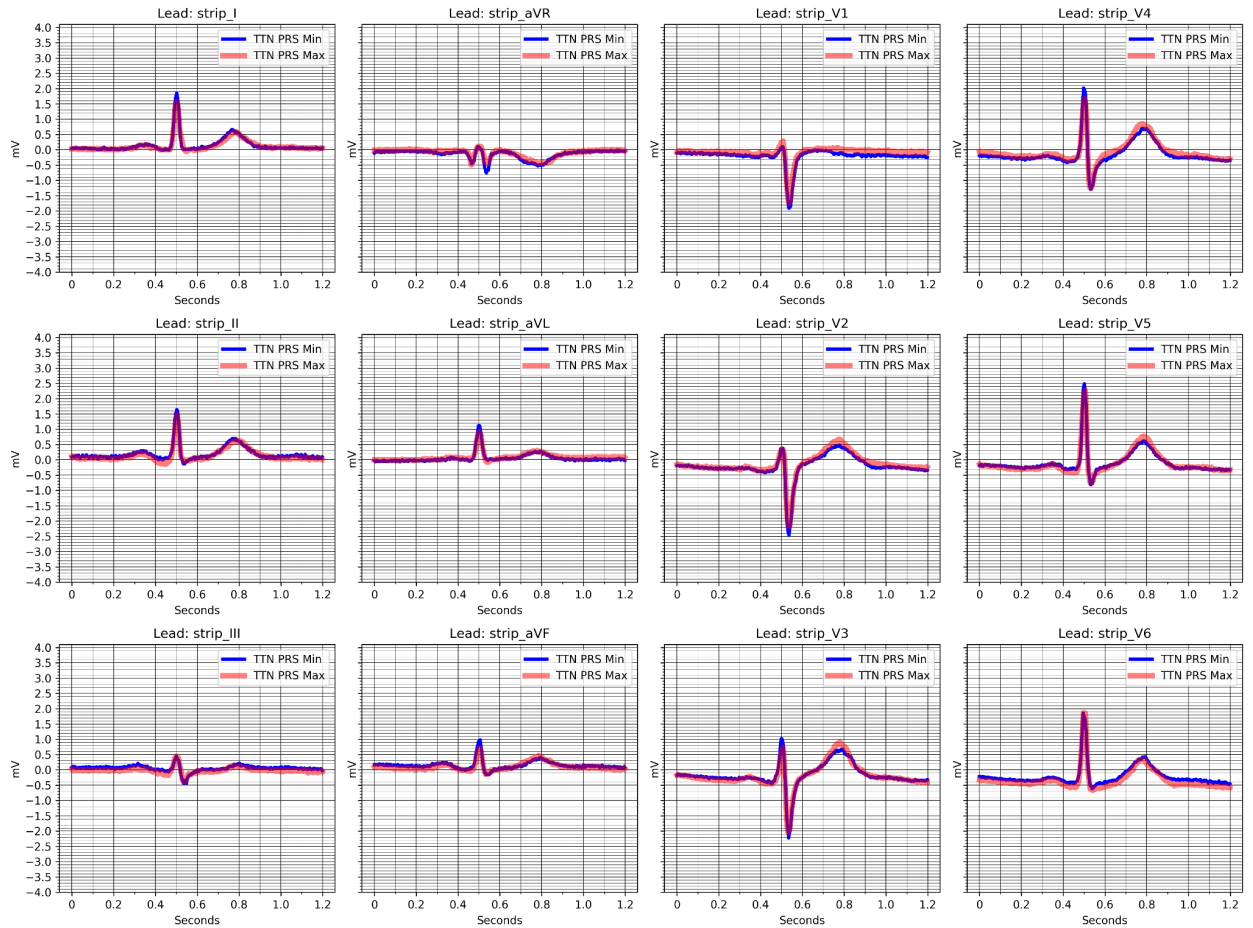



## b. *SCN5A/10A* region

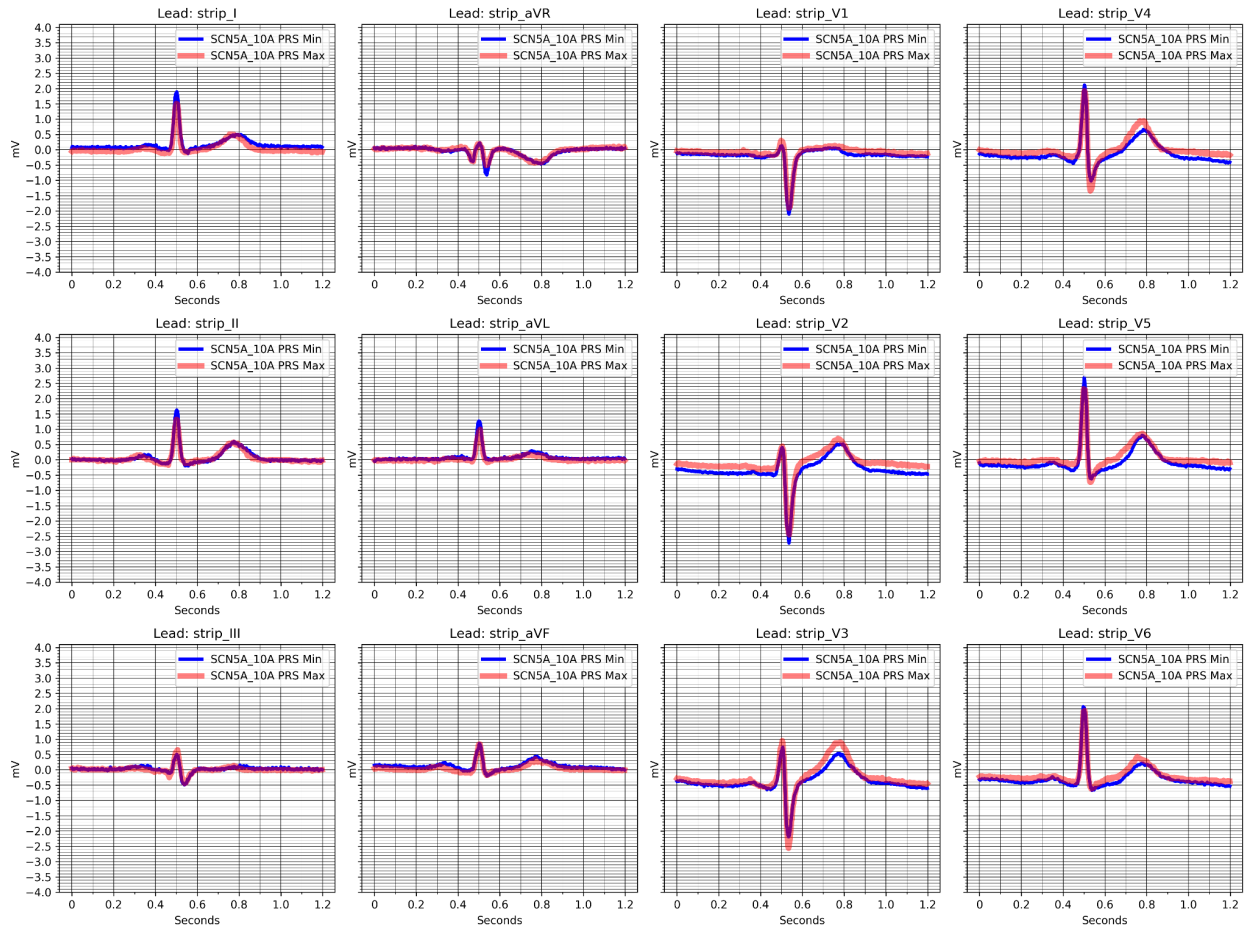



### c. *VGLL2* region

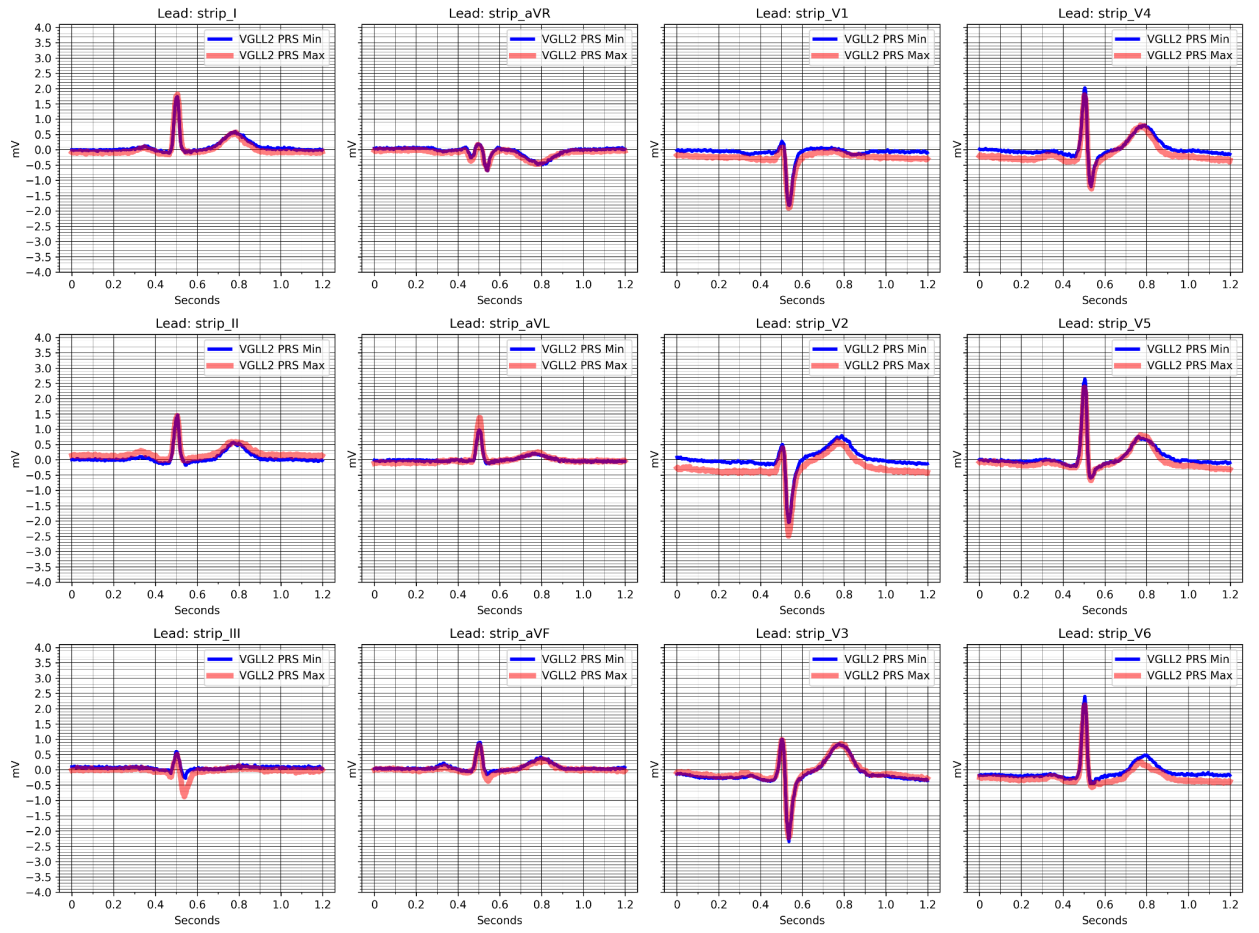

#### d. *EXT1* region

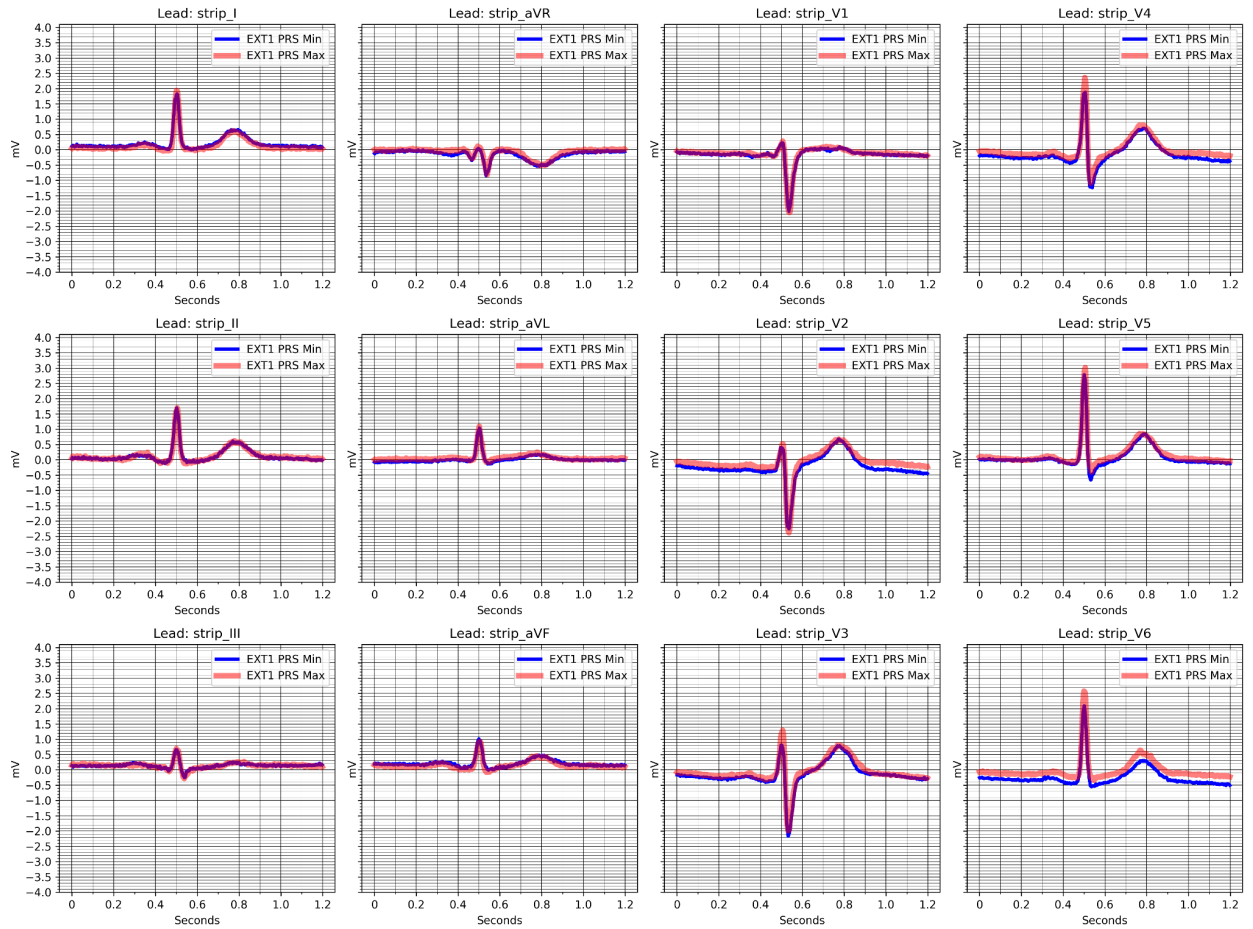

Red ECGs represent individuals in the highest 1% risk group and blue ECGs represent individuals in the lowest 1% risk group. The risk groups were defined using a PRS reflecting the SNPs from the ECG-AI GWAS in the corresponding gene region  $\pm 500$  kb.
